# 1 Self-reported adaptability among postgraduate dental 2 learners and their instructors: accelerated change induced 3 by COVID-19

4 Short title: Self-reported adaptability of learners and instructors during COVID-19

5 Farah Otaki<sup>1¶</sup>, Fatemeh Amir-Rad<sup>2,3¶</sup>, Manal Al-Halabi<sup>2\*</sup>, Zaid Baqain<sup>2,4</sup>, Nabil Zary<sup>5</sup>

6 <sup>1</sup>Strategy and Institutional Excellence, Mohammed Bin Rashid University of Medicine and  
7 Health Sciences, Dubai, United Arab Emirates.

8 <sup>2</sup>Hamdan Bin Mohammed College of Dental Medicine, Mohammed Bin Rashid University of  
9 Medicine and Health Sciences, Dubai, United Arab Emirates.

10 <sup>3</sup>Masters in Medical Education Programme, Centre for Medical Education, School of  
11 Medicine, University of Dundee, Nethergate, Dundee, United Kingdom.

12 <sup>4</sup>School of Dentistry, University of Jordan, Amman, Jordan.

13 <sup>5</sup>Institute for Excellence in Health Professions Education, Mohammed Bin Rashid University  
14 of Medicine and Health Sciences, Dubai, United Arab Emirates.

15

16

17

18 \*Corresponding Author:

19 Manal Al-Halabi

20 Email: manal.halabi@mbru.ac.ae

21

22 ¶These authors contributed equally to this work.

23

24

## 25    **Abstract**

26    It is forecasted that the skills and competencies necessary for post-pandemic success in  
 27    higher education need to be founded upon adaptability, coping, and Self-regulated Learning  
 28    (SRL). It is worth investigating how stakeholders perceived their adaptability and coping  
 29    with the accelerated change accompanying COVID-19. Accordingly, the purpose of this  
 30    study was to assess the self-reported adaptability of postgraduate dental learners and their  
 31    instructors in the context of abrupt transition to distance learning induced by the pandemic.

32    This study utilized a convergent mixed methods study design. The qualitative and  
 33    quantitative data were concurrently collected from instructors and learners. The datasets were  
 34    analyzed independently, and the generated information was integrated using a joint model  
 35    analysis.

36    The percentage of average of self-reported adaptability of both groups was 81.15%. The  
 37    instructors, with a mean of satisfaction of 17.94 ( $\pm 1.76$ ), rated their adaptability significantly  
 38    higher than the learners, with a mean of satisfaction of 15.66 ( $\pm 2.77$ ) ( $p=0.002$ ). The thematic  
 39    analysis resulted in two interrelated themes: Self and Environment. Within the Self theme,  
 40    three subthemes surfaced: Cognitions, Emotions, Behaviors. As for the Environment theme,  
 41    it encapsulated two subthemes: Enablers and Impediments.

42    The stakeholders perceived themselves to have adapted well to the transition, and SRL  
 43    appeared as a cornerstone in the adaptation to the accelerated change (accompanying  
 44    COVID-19). There appeared to be an interplay between the cognitions, emotions, and  
 45    behaviors on the level of the self as part of the adaptation process. Also, building upon  
 46    existent models of SRL, this study uncovered that the stakeholders considered the  
 47    environment to play a crucial role in their adaptation process. This highlights the importance

48 of developing a climate that remains, despite external pressures, conducive to attaining  
49 learning and teaching goals. It is also crucial for university-level mental health promotion  
50 activities to proactively foster, among learners and instructors, adaptability, building  
51 ‘academic resilience’.

52 **Keywords:**

53 Postgraduate; Dental Education; Distance Learning; COVID-19 Pandemic; Change  
54 Management; Accelerated Change; Adaptability; Self-regulated Learning.

## 55 Introduction

56 The COVID-19 pandemic made characterizing today's world as Volatile, Uncertain,  
 57 Complex and Ambiguous (VUCA) more relevant than ever before (1-3). This pandemic  
 58 brought about an accelerated change where remote interaction became the only plausible  
 59 solution at a point in time. The need to "go remote" at the onset of the pandemic accelerated  
 60 innovation in telecommunication. It brought to the forefront the previously underused  
 61 internet-based services and products, such as telehealth (4), e-commerce (5), and distance  
 62 learning (6).

63 This accelerated change was evident in higher education (6), where learning and teaching all  
 64 around the world had to switch to the online environment abruptly (7). The volatility of the  
 65 environment got heightened due to the continuous changes that this sector is having to keep  
 66 up with (8). This is associated with uncertainty. Although a lot of research and investigations  
 67 are taking place to enable foresight (9), no one knows with any great certainty the current and  
 68 long-term effect of the pandemic on learning and teaching. The situation has been novel and  
 69 seemingly uncontrollable and remains unresolved (10). The introduced complexity has been  
 70 evident on all socioecological levels of higher education, where stakeholders need to deal  
 71 with diverse stressors (including but not limited to: safety concerns, sense of isolation and  
 72 loneliness, and complete disruption of daily routines), along with mental health difficulties  
 73 such as isolation and loneliness (10), and depression and anxiety (11). Since these times are  
 74 unprecedented, there is a substantial amount of ambiguity that all the higher education  
 75 stakeholders need to deal with (11); everyone appears to be resorting to trial-and-error  
 76 techniques to adapt (12).

77 This situation revealed how inadequately prepared higher education was for radical  
 78 transformation (13-16). This is especially true in health professions education, where  
 79 educators got challenged with ensuring the protection of the health and wellbeing of all their  
 80 stakeholders, including the trainees, continuity of quality education, confidence in health and  
 81 safety measures, and abidance to guidelines for clinical training. Many teaching clinics and  
 82 academic hospitals ended up suspending all activities involving trainees. This significantly  
 83 affected students' quality of education, where their experiential learning and clinical exposure  
 84 got compromised considerably (17). If not made up for, this gap in clinical learning will  
 85 inevitably impact developing the competencies required for nurturing and graduating safe,  
 86 competent healthcare providers (18).

87 It is forecasted that the skills and competencies necessary for post-pandemic success in  
 88 education during the next five years need to be founded upon adopting skills related to  
 89 emotional intelligence, learning and innovation, and information, media, and technology (19-  
 90 21). Accordingly, from an educational psychology perspective, it is essential to highlight  
 91 Self-regulated Learning (SRL) and its constituents. Systemically leveraging the cognitive,  
 92 metacognitive, behavioral, motivational, and emotional/affective aspects of learning becomes  
 93 more important as the external environment becomes more challenging. This, in turn, will  
 94 raise their self-efficacy and sense of agency, cognitive resilience, and adaptability (22). In  
 95 fact, from this perspective, adaptability, coping, and SRL becomes intertwined. Adaptability  
 96 has been conceptualized and defined as "... the capacity to constructively regulate psycho-  
 97 behavioral functions in response to new, changing, and/or uncertain circumstances,  
 98 conditions, and situations..." (23).

99 It is worth investigating how well the relevant stakeholders perceived themselves to adapt  
 100 and cope with the accelerated change, and the corresponding VUCA, accompanying COVID-

19. Accordingly, the purpose of this study was to assess the self-reported adaptability of postgraduate dental learners and their instructors in the context of abrupt transition to distance learning induced by the onset of the pandemic. The study's research questions were as follows:

- How adaptable did the stakeholders under investigation perceived themselves to be?
- How did the stakeholders adapt their approaches (be it in relation to the learning and teaching, or otherwise) to cope with the accelerated change?
- How can other postgraduate dental schools proactively raise the level of adaptability of individuals and the all-encapsulating institutions?

## Materials and methods

### Context of the study

This study took place at the Mohammed Bin Rashid University of Medicine and Health Sciences (MBRU), Dubai, UAE in the Hamdan Bin Mohammed College of Dental Medicine (HBMCDM). This postgraduate dental college offers three-year full-time specialty dental postgraduate programs in prosthodontics, periodontics, pediatric dentistry, orthodontics, and endodontics.

### Responding to COVID-19

HBMCDM, along with all other educational institutions in the UAE, switched to complete distance learning from 22<sup>nd</sup> March 2020 until the end of the respective academic year. Despite all the surfacing impediments, HBMCDM stakeholders managed to continue all didactic educational activities as previously scheduled (6).

### Transitioning to distance learning

Two digital platforms were utilized to deliver distance learning, the Learning Management System (LMS) and Microsoft Teams. These platforms enabled real-time class presentations, research dissertation-related communications, and clinical case-based discussions (CBD). In addition, some instructors pre-recorded their lectures for learners to access and ‘consume’ the content at their convenience.

MBRU Faculty Development and Information Technology (IT) support teams conducted training sessions and designated technical support personnel to assist the faculty throughout the transition. Although a previously set schedule for the delivery of all didactic courses was



maintained, the instructors limited the sessions' length to one hour each. They provided reading material before the teaching sessions to deliver the lessons' intended learning outcomes within the shortened duration. Class attendance was registered on MBRU Self-Service portal. To partially compensate for the lack of clinical learning due to the suspension of clinics, CBD was delivered on MS Teams across two four-hour sessions per week.

Due to the absence of live proctoring and the inability to conduct final examinations on-campus, instructors were encouraged to consider alternative assessment methods that test the attainment of the courses' learning outcomes and hold the learners accountable to academic integrity. Instructors were encouraged to conduct assessments orally using clinical scenarios, especially in complex multidisciplinary cases via MS Teams. The LMS system, through which written exams were conducted, adopted a lockdown browser requirement preventing access to any other application during the exam. Also, activation of the webcam, in the learners' devices, was required. Adequate training and support were provided to both learners and instructors on using the additional exam security requirements mentioned.

## **Research design**

The study's ethical approval was granted by the MBRU, Institutional Review Board (Reference # MBRU-IRB-2020-032). As part of a multi-phased research project, this convergent mixed methods study design (24) was adopted to develop a thorough understanding of the extent of adaptability of the learners and their instructors during the rapid transition to distance learning due to COVID-19. To start with, the qualitative and quantitative data were concurrently collected (from both groups of stakeholders: instructors and learners). The quantitative datasets were analyzed independently from the qualitative datasets. Then, the generated information was integrated relying on joint model analysis (25, 26).

## Data collection

The data was collected using a survey that was designed specifically for this research project.

The survey was composed of two segments. The first segment constitutes four components measured against a Likert-type scale of five points (1: Strongly Disagree, 2: Disagree, 3: Neutral, 4: Agree, and 5: Strongly Agree). The 4 components are as follows:

1. I was able to effectively cope with the higher technological demands of distance learning.
2. I was able to manage my time and efforts to cope with the transition to distance learning.
3. I was able to monitor and evaluate my performance, and if need be- intervene, to cope with the transition to distance learning.
4. I sought help, if needed, from students, colleagues, University staff, and/ or family members to cope with the transition to distance learning.

The second segment of the survey was meant to be exploratory to solicit for qualitative data using the following open-ended questions:

- How did you feel about the transition to distance learning at the beginning?
- How do you feel about the transition to distance learning now that some time has elapsed?
- How did you cope with the transition to distance learning (related to the learning experience, or otherwise: personal-level, environment, and friends and family)?
- Reflect on the changes to your teaching approach due to the transition to distance learning.

All full-time and part-time faculty involved in the distance learning at HBMCDM were invited to participate. Students from the five different postgraduate programs in all three levels were also invited to participate. No personal identifiers were recorded to ensure the privacy and confidentiality of all participants. The participation in this survey was completely voluntary. The survey was open for learners and instructors for participation from May 1<sup>st</sup> through 31<sup>st</sup> 2020. At the time of data collection, HBMCDM had 21 instructors and 63 students. The faculty was composed of 5 females and 16 males, with an average age of 48 years. The faculty were of 12 different nationalities, with the following distribution of academic rankings: 4 professors, 5 associate professors, 5 assistant professors, and 7 lecturers. Nineteen were full-time and 2 were part-time employees. The learners consisted of 44 females and 19 males, distributed across 16 different nationalities, with an average age of 30.9 years.

The Strategy and Institutional Excellence team at MBRU (i.e., the unit handling the Quality Assurance and Institutional Effectiveness portfolio) sent an email, with the survey link, to all participants on May 1<sup>st</sup>. Weekly email reminders were sent out until the closing of the survey on May 31<sup>st</sup>. Also, the Dean of HBMCDM sent emails to both the faculty and students' groups independently to highlight the importance and value of voicing one's opinion through participating in this survey.

## **Data analyses**

### **Quantitative analysis**

The quantitative data was descriptively analyzed using SPSS for Windows version 27. For each of the four quantitative components, the mean and standard deviation were generated. An overall score of adaptability was calculated.

Since the scale used for capturing the perception of the learners and instructors was tailor-made for this study, the validity tests of Cronbach's Alpha and the Principal Component Analysis (PCA) were performed to ensure internal consistency and check external variance, respectively, of the adapted tool.

To select the appropriate inferential analysis test, a test of normality was conducted for each of the four components and for the score of adaptability. The data of each of the four components, independently, and the score of adaptability all turned out to be not normally distributed. Accordingly, the Mann-Whitney test was used to compare the overall score of adaptability, and each component independently, between both groups of stakeholders (learners and instructors).

## **Qualitative analysis**

The qualitative data analysis started after the completion of the data collection phase. The data was inductively analyzed using thematic analysis. The process of analysis followed Braun and Clarke (2006) (27) six-step framework, which is a recommended approach for thematic analysis in health professions' education (28). The indicated six steps for conducting thematic analysis include: 1- familiarizing oneself with the data, 2- generating initial codes, 3- searching for themes, 4- reviewing themes, 5- defining and naming themes, and 6- producing the report.

NVivo software version 12 plus (QSR International Pty Ltd, Vic, Australia) was used to code the data, and in turn, facilitate the categorization of the relevant text fragments. The data collected from each of the two groups of stakeholders was handled separately.

First, two researchers (FO and FAR) familiarized themselves with the data by examining and re-examining the qualitative data. Second, the qualitative, narrative data was examined line-

by-line and initial codes were generated. The two researchers underwent several rounds of discussions to resolve any discordances between their observations. Third, the initial codes were inductively investigated to be combined into subthemes, which in turn went through a similar iterative process to construct themes. The generated themes and sub-themes were then reviewed as part of stage four to ensure that the data within each compartment (i.e., theme or subtheme) are sufficiently common and coherent, also the compartments are adequately distinct from each other. As part of stage five, themes and subthemes were coded and defined in the context of the study. The last step constituted of reporting upon the findings of the qualitative analysis.

### **Mixed Methods Integration**

After completing the independent quantitative and qualitative analyses, the outputs were systematically integrated via joint display analysis. This involved merging the results from the two datasets through a side-by-side comparison to assess the best way to map the findings onto each other. This iterative process enabled developing a whole that is greater than the sum of its parts (24, 29). As such, the convergence of findings led to the development of a better understanding of the adaptability of learners and instructors during the transitioning to distance learning.

The Pillar Integration Process (PIP) framework, initially presented by Johnson et al. (2017) (30), was selected as the foundation of the adapted joint display analysis. The four stages of PIP were completed sequentially: 1- presenting the quantitative raw data and findings on the left side of the display, 2- exhibiting the qualitative raw data and findings on the right side of the display (establishing links between both sides of the display where possible), 3- confirming that both sides of the display match each other (as much as possible), and 4- “pillar-building” which is the ultimate stage of this process leading to the generation of meta-

248 inferences which are position in the center of the display. As such, areas of data confirmation  
249 (where findings from both datasets reinforce each other) and data expansion (where a finding  
250 from one type of analysis is unique and has no match in the other type of analysis, but rather  
251 expand upon it by establishing complementarity) were identified.

## Results

The final respondents' number was 53 out of 63 learners (i.e., response rate was 84%). As for the instructors, 18 faculty members out of 21 responded (i.e., response rate was 86%). A unique identification number was given to each of the 71 participants. It was complimented with 'R' for the learners and 'I' for the instructors (i.e., participants 1 through 53 were followed by 'R', and 54 through 71 by 'I').

## Quantitative analyses

The reliability score of Cronbach's Alpha for the evaluation instrument, which captured the stakeholders' perception, was 82.4%. The percentage of the total average of the learners, instructors, and both groups of stakeholders were 78.3%, 89.7%, and 81.15%, respectively, as per Table 1.

Table 1 Output of descriptive quantitative analysis

| Stakeholder: |                                                                                            | Learners      |                           |          | Instructors   |                           |          | Both Groups of Stakeholders |                           |          |
|--------------|--------------------------------------------------------------------------------------------|---------------|---------------------------|----------|---------------|---------------------------|----------|-----------------------------|---------------------------|----------|
| Component    |                                                                                            | Mean<br>±SD   | Percentage of the<br>Mean | Category | Mean<br>±SD   | Percentage of the<br>Mean | Category | Mean<br>±SD                 | Percentage of the<br>Mean | Category |
| 1            | I was able to effectively cope with the higher technological demands of distance learning. | 4.08<br>±0.81 | 81.6                      | A-SA     | 4.56<br>±0.51 | 91.2                      | A-SA     | 4.20<br>±0.77               | 84                        | A-SA     |
| 2            | I was able to manage my time and efforts to cope with the transition to                    | 3.79<br>±0.99 | 75.8                      | A        | 4.56<br>±0.71 | 91.2                      | A-SA     | 3.99<br>±0.98               | 79.8                      | A        |

|                                       |                                                                                                                                                 |                |      |   |               |      |      |               |       |      |
|---------------------------------------|-------------------------------------------------------------------------------------------------------------------------------------------------|----------------|------|---|---------------|------|------|---------------|-------|------|
|                                       | distance learning.                                                                                                                              |                |      |   |               |      |      |               |       |      |
| <b>3</b>                              | I was able to monitor and evaluate my performance, and if need be- intervene, to cope with the transition to distance learning.                 | 3.81<br>±0.86  | 76.2 | A | 4.44<br>±0.62 | 88.8 | A-SA | 3.97<br>±0.85 | 79.4  | A    |
| <b>4</b>                              | I sought help, if needed, from students, colleagues, University staff, and/ or family members to cope with the transition to distance learning. | 3.98<br>±0.75  | 79.6 | A | 4.39<br>±0.70 | 87.8 | A-SA | 4.08<br>±0.75 | 81.6  | A-SA |
| Total Average/ Score of Adaptability: |                                                                                                                                                 | 15.66<br>±2.77 | 78.3 | A | 17.94±1.76    | 89.7 | A-SA | 16.23±2.73    | 81.15 | A-SA |

A= Agree, SA= Strongly Agree

According to the PCA, 87.1% of the variance can be explained by the instrument, which means the instrument is reliable and valid to measure what it is intended to measure.

As illustrated in Fig 1, the instructors, with a mean of satisfaction of 17.94(±1.76), rated their adaptability higher than the learners, with a mean of satisfaction of 15.66(±2.77) (p=0.002).

Fig 1 Comparison between percentages of the mean per component (1 through 4) between learners and instructors



## Qualitative Data

The thematic analysis resulted in two interrelated themes: Self and Environment, as illustrated in this study's conceptual framework (Fig 2). Within the Self theme, three interrelated subthemes surfaced: Cognitions, Emotions, Behaviors. As for the Environment theme, it encapsulated two subthemes: Enablers and Impediments.

Fig 2 Study's Conceptual Framework

### Theme 1: Self

This theme focuses on intrapersonal factors that appeared to influence the learners' and/ or the instructors' adaptability.

#### *Cognitions*

This subtheme refers to thought processes that the individual learners and instructors seemed to be experiencing. These thoughts appeared to be related to oneself, other people, and/ or the context of experience.

#### *Oneself (including meta-cognitions)*

The stakeholders appeared to be judging themselves. They have somehow developed an opinion about how well they adapted to the situation.

L-9: "...I adapted and performed much better than I expected..."

I-19: "...I believed in myself; I was confident about my abilities to successfully transition to distance learning..."

In many instances, the learners and instructors appeared to be interpreting their own thoughts and understandings during the transition to distance learning.

L-10: "...I could not stay focused for long periods of time..."

L-31: "...most of the time, I was not able to focus my thoughts. I frequently experienced brain fogs...."

I-11: "...I was quite confused, at the beginning. For example, I was not sure if I needed to look at the laptop camera or at the screen where my presentation was shared from my desktop..."

## Other people

The study participants reflected upon their own thoughts and opinions about others.

L-5: "...not sure if other students were paying attention during the lectures..."

I-11: "...at the beginning, I was doubting the students' engagement..."

I-12: "...I think we became more interactive, over time. At the beginning, it was a challenge to both groups of stakeholders: the instructors and students. Eventually, we comprehended what a virtual classroom is..."

## Context of experience

The participants also discussed their views around aspects related to their environment and the context of the experience. Some learners perceived the distance learning experiences to be difficult:

L-16: "...I found the experience to be quite challenging; I could not concentrate at home. It is not the right place to attend a class from..."

312 L-46: "... distance learning is sort of different from that which happens on campus in  
313 terms of motivation and interactions..."

314 I-11: "...the idea of finding myself on my own in my room, interacting with a screen  
315 was quite challenging..."

316 Others showed openness to and acceptance of the new experiences. They were grateful to the  
317 fact that the virtual environment enabled the continuation of learning in a time when in-  
318 person activities became unsafe.

319 L-9: "...it has been a pleasant new experience... I was intentional about adapting to  
320 the reality of the situation. I perceived it to be to our own benefit..."

321 L-45: "...at the beginning I was wondering how it will be. Later, I got surprised by  
322 how smooth the transition was..."

323 I-7: "...the distance learning was the best available alternative..."

324 I-9: "...the online teaching experience brought with it plenty of new opportunities. It  
325 has broadened the scope of learning and teaching..."

## 326 *Emotions*

327 This theme sheds light on the emotions that the participating learners and instructors  
328 experienced in adjusting to the distance learning and teaching. Some emotions were positive,  
329 and others were negative.

### 330 *Positive (including motivational affects)*

331 The study participants expressed several positive emotions:

332 L-7: "...I felt excited about trying this new experience..."

333 I-19: "...I am happy about all facets of distance learning..."

334 Negative

335 The stakeholders also expressed negative emotions. Its sudden onset and all the uncertainty  
336 around it were quite disturbing to some learners and instructors.

337 L-17: "...I was doubtful..."

338 I-6: "...I felt slight apprehension..."

339 I-8: "...I felt skeptical about the feasibility of the transition and maintenance of  
340 distance learning. How are we supposed to acquire the needed skills virtually? We are  
341 meant to become clinicians after all..."

342 Several learners referred to an elevation in their level of anxiety. Besides worrying, the  
343 learners also expressed anger, frustration, and changes in energy levels. Between caretaking,  
344 housework, kids' homeschooling, and learning, some found personal and professional time  
345 blended.

346 L-2: "...I experienced feelings of frustration and exhaustion- there were many  
347 competing responsibilities, all taking place at home..."

348 L-3: "...I felt confused. Also, I got frustrated due to the many internet-related  
349 problems that I faced. This led to time management issues..."

350 L-46: "...I felt anxious, but I had trust that MBRU will find a way around the  
351 challenge, and will continue on providing us with the best..."

## 352 *Behaviors*

353 This theme encapsulates all the different actions that the stakeholders partook to adapt to the  
354 change. It also included all the skills needed to exercise to keep up with the challenges  
355 inherent in the transition. The stakeholders differentiated between the behavioral changes that  
356 turned out to be conducive and those that appeared to them not to add any value to their  
357 experiences.

## 358 *Constructive*

359 Among the actions that were deployed, some turned out to be to the advantage of the learners  
360 and instructors. Some learners proactively developed opportunities to connect with peers;  
361 their engagement in virtual study groups added value to their learning strategies during the  
362 transition to distance learning.

363 L-14: "...I developed the habit to regularly meet with my colleagues online to study  
364 the lectures together..."

365 L-15: "...participating in group study was one of the best ways to keep distance  
366 learning as similar as possible to that of typical conditions...."

367 The learners also developed and deployed their time management skills.

368 I-7: "...I had to adjust my schedule to make better use of my time..."

369 Also, some learners were intentionally more engaged in the virtual context, relative to face-  
370 to-face interactions.

371 L-47: "...I started reading and researching more. I also developed the habit to prepare  
372 for the lectures, before the actual time the classes take place..."

373 L-7: "...I focused on preparing for the lecture ahead of time, and I maximized my  
374 participation during the meeting. It was clear that our instructors were trying their best  
375 to make-up for the interpersonal gap. When I have a lecture to present, I try to have to  
376 have pauses every now and then with a funny slide or so to refresh the energy of my  
377 colleagues..."

378 Instructors adjusted their teaching strategies to engage learners. They adopted techniques to  
379 foster meaningfulness in their connection with the learners and overcome physical and  
380 emotional isolation.

381 I-11: "...I started to share more links, videos, and reading materials with my residents  
382 to further support their learning. We arranged for online meetings on Teams to discuss  
383 their research projects, and address and reflect upon inquiries related to their  
384 presentation..."

385 I-12: "...our residents stayed in touch via WhatsApp groups that were created during  
386 the lockdown. It made connecting with and updating each other easier..."

387 Some stakeholders realized that they were proactive in modifying their physical environment  
388 at home for it to become more conducive to their learning and teaching targets.

389 L-22: "...I arrange a studying set-up at home... I made the effort to change this set-up  
390 from time to time..."

391 I-11: "...allocating a working space at home was also very helpful. I get into my work  
392 mode as soon as I land on this desk..."

## 393 Futile

394 In their attempt to cope with the transition, some stakeholders resorted to behaviors that did  
395 not add value to their experience. Learners were suddenly faced with many responsibilities  
396 that they needed to attend to concurrently from the same space. A few of those learners  
397 seemed to deal with all their responsibilities as one chunk, without any sort of  
398 compartmentalization.

399 L-12: "...It has been difficult to suddenly be required to manage both family and  
400 university at once, in the same place..."

401 Other learners could not bear the fear and uncertainty inherent in the situation and ended up  
402 overworking themselves as a coping mechanism.

403 L-7: "...the transition and isolation, and all the accompanying stress and fear are  
404 making me spend most of the time studying, which is getting quite stressful. I barely  
405 have any time left for myself. What I used to finish in one hour, now takes me 3  
406 hours..."

407 Some learners needed to lessen their level of interactions to deal with their anxiety and  
408 insecurities.

409 L-24: "...I was hesitant to participate in the class unlike in the normal class setting I  
410 would have been more interactive..."

## 411 Theme 2: ENVIRONMENT

412 This theme refers to external factors that the stakeholders perceived to have affected the  
413 learning and teaching experience positively or negatively.

## 414 *Enablers*

415 Among those external variables that the stakeholders shed light on were ones that inspired,  
 416 enabled, and/ or empowered the learners and their instructors. For example, the stakeholders  
 417 particularly emphasized that the understanding of family members was crucial for effectively  
 418 transition.

419 L-21: "...the most important thing that my family understand the situation and do not  
 420 interrupt me during my classes..."

421 Also, relying on family and friends for support and comfort was frequently brought-up by the  
 422 study participants. The role of close family members appeared to be quite helpful in  
 423 facilitating the individual-level adjustments that needed to take place.

424 L-47: "...it was not very difficult to cope on my own; my family was supporting and  
 425 comforting me all the time..."

426 I-9: "...I coped well; thanks to good friends and family..."

427 In some cases, the instructors shed light on how the fact that they had rapport with the  
 428 students enabled and smoothened the transition.

429 I-11: "...I think it is more convenient to move to distance learning after knowing the  
 430 residents and they get to know you through face-to-face interaction..."

431 The participating stakeholders highlighted that one of the significant external resources was  
 432 the educational institution itself. This included how the institution led the transition and  
 433 provided all different kinds of support at various institutional levels to both learners and  
 434 instructors.



435 L-24: "...the university was very cooperative...the instructors made me feel at ease,  
436 my colleagues kept on sharing with me stories of the obstacles that they had to go  
437 through and how they overcame them...."

438 I-12: "...the transition has been managed professionally by MBRU leaders and staff  
439 members, along with faculty members and other stakeholders who are directly  
440 involved in the learning and teaching. I perceive the transition to have happened  
441 smoothly..."

442 I-15: "...transition was a lot easier than I expected; thanks to Information Technology  
443 team support..."

#### 444 *Impediments*

445 The stakeholders also identified external variables that they felt held them back, discouraged  
446 them, and/ or slowed them down. For example, learners indicated the challenge of the  
447 competing responsibilities that arose because of the pandemic and that needed to be attended  
448 to concurrently from the same physical space. They needed to strike a balance between  
449 keeping up with their educational duties and their personal and/ or familial life.

450 L-2: "... personally, I have no free time to read any supplementary material assigned  
451 by my instructors. I am always busy; we have to be available 24 hours a day, 7 days a  
452 week for anything or everything at home..."

453 L-3: "...it was quite challenging in the beginning. I could not continue having a part-  
454 time homecare nurse to support me with taking care of my father. Her part-time  
455 constituted a risk in terms of transferring the virus in between her multiple work  
456 duties..."

457 L-38: "...All of a sudden, I needed to keep an eye on my kids of 5 and 3 years of age,  
458 along with homeschooling them, while living-up to my learning obligations..."

459 L-25: "...I disliked it! I am a mother and having my kids around does not make it  
460 easy to focus. My kids need home schooling and supervision while I am having my  
461 classes..."

462 Some stakeholders considered that the lack of opportunities of hands-on and clinical  
463 experiences constitute a hindrance or obstruction towards their learning or teaching  
464 objectives.

465 I-2: "...in some areas it was ok, but others require interaction with students and  
466 hands-on experience..."

467 L-5: "...I miss my clinical work and patients, which is demotivating me..."

468 The sudden transition to the online environment accompanied by the isolation due to the  
469 social distancing directives constituted to almost all participants an external challenge that  
470 they needed to overcome. Some of the learners mentioned the loss of connection with others  
471 due to isolation. There were also the inevitable adverse effects of using electronic devices for  
472 long periods, which caused digital eye strain and/ or headaches among the learners.

473 L-14: "...it was hard to study at home sometimes, due to isolation. Studying on my  
474 own without my colleagues really affected me..."

475 L-14: "...I noticed that I was regularly experiencing headaches while studying from  
476 home, which was not the case prior COVID-19. These episodes were maybe induced  
477 by the heavy reliance on technologies and electronics..."

Disruption of daily routine and its consequences were repeatedly referred to by the learners and instructors. The switch to digital learning also resulted in sleep deprivation among our stakeholders. This, in turn, generated fatigue and in some cases burnout; the stakeholders observed that they were stretching themselves too thin.

L-2: "...the changes to my routine and increasing responsibilities were accompanied with lack of sleep. My lifestyle has not been healthy and there is very little that I can do about it..."

L-7: "...my personal space got conquered; I do not have the time now to recharge my own energy..."

I-5: "...not having a real break. It can get really tiring. With the lectures and meetings, I feel like I have been working 24/7..."

## **Mixed Methods Integration**

The PIP joint display visually conveys the inferences of the quantitative and qualitative analyses and meta-inferences generated by merging the outputs of both analyses. As depicted in Table 2, it is evident that the stakeholders perceive themselves to have adapted well to the transition, where the qualitative and the quantitative output of data analyses confirm each other. Relevantly, the quantitative analysis also revealed that the instructors perceive themselves to be adaptable significantly more than how adaptable the learners perceive themselves to be. These findings appear to complement the qualitative findings that there is an interplay between the cognitions, emotions, and behaviors on the level of the self as part of the adaptation process. Also, on its own, the qualitative findings shed light on the fact that the stakeholders considered the environment to play an essential role in their adaptation process, where they pinpointed enablers and impediments.

1 Table 2 The study's joint display (merging of the quantitative with the quantitative output of analyses)

| Quantitative→                                                                                                                                                                                                                                                                                                                                                                                                                                                                                                                                                                                                                                                                                                                                                                                     |              | Pillar<br>(Meta-inferences) | ←Qualitative                                           |                                                                                                                                                             |                                                                                                                                                               |     |                                                                              |     |                                   |     |                                                                                                                                                                                                                                                                                                                                                                                                                                                                         |                                                                                                                                                                                                                                                                                                                                                                                                                 |      |            |                                                                                                           |                                                                                                                         |
|---------------------------------------------------------------------------------------------------------------------------------------------------------------------------------------------------------------------------------------------------------------------------------------------------------------------------------------------------------------------------------------------------------------------------------------------------------------------------------------------------------------------------------------------------------------------------------------------------------------------------------------------------------------------------------------------------------------------------------------------------------------------------------------------------|--------------|-----------------------------|--------------------------------------------------------|-------------------------------------------------------------------------------------------------------------------------------------------------------------|---------------------------------------------------------------------------------------------------------------------------------------------------------------|-----|------------------------------------------------------------------------------|-----|-----------------------------------|-----|-------------------------------------------------------------------------------------------------------------------------------------------------------------------------------------------------------------------------------------------------------------------------------------------------------------------------------------------------------------------------------------------------------------------------------------------------------------------------|-----------------------------------------------------------------------------------------------------------------------------------------------------------------------------------------------------------------------------------------------------------------------------------------------------------------------------------------------------------------------------------------------------------------|------|------------|-----------------------------------------------------------------------------------------------------------|-------------------------------------------------------------------------------------------------------------------------|
| Output of Analysis                                                                                                                                                                                                                                                                                                                                                                                                                                                                                                                                                                                                                                                                                                                                                                                | Key Findings |                             | Key Findings (Conceptual Framework)                    | Findings                                                                                                                                                    |                                                                                                                                                               |     |                                                                              |     |                                   |     |                                                                                                                                                                                                                                                                                                                                                                                                                                                                         |                                                                                                                                                                                                                                                                                                                                                                                                                 |      |            |                                                                                                           |                                                                                                                         |
|                                                                                                                                                                                                                                                                                                                                                                                                                                                                                                                                                                                                                                                                                                                                                                                                   |              |                             |                                                        | Learners                                                                                                                                                    | Instructors                                                                                                                                                   |     |                                                                              |     |                                   |     |                                                                                                                                                                                                                                                                                                                                                                                                                                                                         |                                                                                                                                                                                                                                                                                                                                                                                                                 |      |            |                                                                                                           |                                                                                                                         |
| <div><p>Percentages of the mean (of self-reported adaptability) per component</p>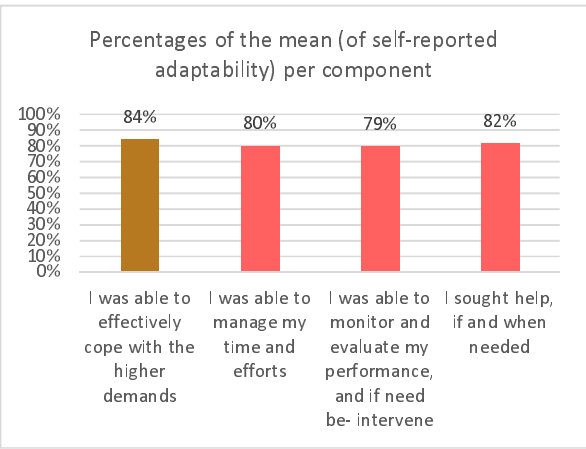<table border="1"><thead><tr><th>Component</th><th>Percentage</th></tr></thead><tbody><tr><td>I was able to effectively cope with the higher demands</td><td>84%</td></tr><tr><td>I was able to manage my time and efforts</td><td>80%</td></tr><tr><td>I was able to monitor and evaluate my performance, and if need be- intervene</td><td>79%</td></tr><tr><td>I sought help, if and when needed</td><td>82%</td></tr></tbody></table></div> <p>* The instructors, with a mean of satisfaction of 17.94(±1.76), rated their adaptability higher than the learners, with a mean of satisfaction of 15.66(±2.77) (p=0.002).</p> | Component    | Percentage                  | I was able to effectively cope with the higher demands | 84%                                                                                                                                                         | I was able to manage my time and efforts                                                                                                                      | 80% | I was able to monitor and evaluate my performance, and if need be- intervene | 79% | I sought help, if and when needed | 82% | <p>Learners and instructors perceive themselves to have adapted well to the rapid transition</p> <p>Instructors perceive themselves to be adaptable significantly more than how adaptable the learners perceive themselves to be</p> <p>In terms of action/ behavior/ skill, stakeholders perceived themselves to have managed their time and efforts, monitored and evaluated their performance (and if need be- intervened), and sought help (when and if needed)</p> | <ul style="list-style-type: none"><li>• There was an evident interplay between cognitions, emotions, and behaviors that enabled the stakeholders to adapt to the abrupt change.</li><li>• The modifications in behaviors were the most obvious and easiest to identify.</li><li>• From the stakeholders' perception, the instructors appeared to be at an advantage in adapting to the abrupt change.</li></ul> | Self | Cognitions | L-31: "...most of the time, I was not able to focus my thoughts. I frequently experienced brain fogs...." | I-19: "...I believed in myself; I was confident about my abilities to successfully transition to distance learning...." |
| Component                                                                                                                                                                                                                                                                                                                                                                                                                                                                                                                                                                                                                                                                                                                                                                                         | Percentage   |                             |                                                        |                                                                                                                                                             |                                                                                                                                                               |     |                                                                              |     |                                   |     |                                                                                                                                                                                                                                                                                                                                                                                                                                                                         |                                                                                                                                                                                                                                                                                                                                                                                                                 |      |            |                                                                                                           |                                                                                                                         |
| I was able to effectively cope with the higher demands                                                                                                                                                                                                                                                                                                                                                                                                                                                                                                                                                                                                                                                                                                                                            | 84%          |                             |                                                        |                                                                                                                                                             |                                                                                                                                                               |     |                                                                              |     |                                   |     |                                                                                                                                                                                                                                                                                                                                                                                                                                                                         |                                                                                                                                                                                                                                                                                                                                                                                                                 |      |            |                                                                                                           |                                                                                                                         |
| I was able to manage my time and efforts                                                                                                                                                                                                                                                                                                                                                                                                                                                                                                                                                                                                                                                                                                                                                          | 80%          |                             |                                                        |                                                                                                                                                             |                                                                                                                                                               |     |                                                                              |     |                                   |     |                                                                                                                                                                                                                                                                                                                                                                                                                                                                         |                                                                                                                                                                                                                                                                                                                                                                                                                 |      |            |                                                                                                           |                                                                                                                         |
| I was able to monitor and evaluate my performance, and if need be- intervene                                                                                                                                                                                                                                                                                                                                                                                                                                                                                                                                                                                                                                                                                                                      | 79%          |                             |                                                        |                                                                                                                                                             |                                                                                                                                                               |     |                                                                              |     |                                   |     |                                                                                                                                                                                                                                                                                                                                                                                                                                                                         |                                                                                                                                                                                                                                                                                                                                                                                                                 |      |            |                                                                                                           |                                                                                                                         |
| I sought help, if and when needed                                                                                                                                                                                                                                                                                                                                                                                                                                                                                                                                                                                                                                                                                                                                                                 | 82%          |                             |                                                        |                                                                                                                                                             |                                                                                                                                                               |     |                                                                              |     |                                   |     |                                                                                                                                                                                                                                                                                                                                                                                                                                                                         |                                                                                                                                                                                                                                                                                                                                                                                                                 |      |            |                                                                                                           |                                                                                                                         |
|                                                                                                                                                                                                                                                                                                                                                                                                                                                                                                                                                                                                                                                                                                                                                                                                   |              |                             | Emotions                                               | L-7: "...I felt excited about trying this new experience..."                                                                                                | I-6: "...I felt slight apprehension..."                                                                                                                       |     |                                                                              |     |                                   |     |                                                                                                                                                                                                                                                                                                                                                                                                                                                                         |                                                                                                                                                                                                                                                                                                                                                                                                                 |      |            |                                                                                                           |                                                                                                                         |
|                                                                                                                                                                                                                                                                                                                                                                                                                                                                                                                                                                                                                                                                                                                                                                                                   |              |                             | Behaviors                                              | L-47: "...I started reading and researching more. I also developed the habit to prepare for the lectures, before the actual time the classes take place..." | I-12: "...our residents stayed in touch via WhatsApp groups that were created during the lockdown. It made connecting with and updating each other easier..." |     |                                                                              |     |                                   |     |                                                                                                                                                                                                                                                                                                                                                                                                                                                                         |                                                                                                                                                                                                                                                                                                                                                                                                                 |      |            |                                                                                                           |                                                                                                                         |

|  |  |                                                                                                                                                                                            |             |             |                                                                                                                                                                                                                              |                                                                                                                                      |
|--|--|--------------------------------------------------------------------------------------------------------------------------------------------------------------------------------------------|-------------|-------------|------------------------------------------------------------------------------------------------------------------------------------------------------------------------------------------------------------------------------|--------------------------------------------------------------------------------------------------------------------------------------|
|  |  | <ul style="list-style-type: none"> <li>Attributes of the environment (be it the Enablers or the Impediments) were clear to have played an active role in the adaptation process</li> </ul> | Environment | Enablers    | L-24: "...the university was very cooperative...the instructors made me feel at ease, my colleagues kept on sharing with me stories of the obstacles that they had to go through and how they overcame them...."             | I-9: "...I coped well; thanks to good friends and family..."                                                                         |
|  |  |                                                                                                                                                                                            |             | Impediments | L-14: "...I noticed that I was regularly experiencing headaches while studying from home, which was not the case prior COVID-19. These episodes were maybe induced by the heavy reliance on technologies and electronics..." | I-5: "...not having a real break. It can get really tiring. With the lectures and meetings, I feel like I have been working 24/7..." |

Legend: The Joint Display visually demonstrates how the output of analyses (as depicted in the Quantitative and Qualitative Results sections) and their corresponding findings (as inferred by the authors from the Results sections of the respective analyses) were mapped onto each other, using Pillar Integration Process.

Each sub-theme of the study's conceptual model (i.e., the output of qualitative analyses) was coded with one of the three primary colors: Yellow, Blue, and Red. All three sub-themes belonged to the overarching 'Self' theme coded in Brown as a representation of the mixing or blending of the three primary colors. Three components of the quantitative analysis are coded in Red because they correspond to the Behavior sub-theme in the qualitative analysis. One of the four components of the quantitative data collection tool is more generic referring to coping through the transition and is hence represented as Brown (referring to the interplay between the three sub-themes).

The second theme of the study: 'Environment' is unique to the qualitative analysis (where no matching counterpart was identified in the quantitative analysis). Hence, in the diagram, this is represented as a dash). This theme is exclusive from the other theme and hence (despite its importance) we chose to differentiate it visually by keeping it without a distinct color.

## Discussion

This study reinforced the notion that students are self-regulated agents who can manage their learning (31). It also taps into the roles that positive and negative emotions play in SRL (32), and the belief (initially suggested by socio-cognitive theory) that individuals acquire knowledge by observing others and social interactions (33, 34). Both groups of stakeholders perceived themselves to have adapted quite well to change. Also, the instructors perceive themselves to be at an advantage relative to the learners in terms of adapting to the abrupt change induced by COVID-19.

This study demonstrated SRL as a cornerstone in the adaptation to the accelerated change (accompanying COVID-19) in health professions' education of the individual learners and their instructors. Both groups of postgraduate dental education stakeholders (the learners and instructors) experienced and reported variation in their cognitions, emotions, and behaviors. There was an evident interplay between these individual-level variables, which enabled the stakeholders to adapt to the abrupt change. The stakeholders in the current study also highlighted attributes of the environment that they believe have played a role in their adaptation processes. Along those lines, a recently conducted cross-sectional study aimed at investigating the associations between adaptability, personality, and levels of learning (affective, cognitive, and behavioral) among university students, revealed that adaptability to the pandemic was associated broadly with more positive reactions across multiple indicators (10). This study emphasized the role of adaptability in learning. It appeared that adaptability is acting as a mediator in the association between personality characteristics (i.e., openness, conscientiousness, extraversion, agreeableness, and neuroticism) and students' reactions to online learning. The more adaptable the students perceived themselves to be, the more constructive were the learning experiences that they reported upon. Moreover, in the same

study, the students who reported greater feelings of belonging and mattering perceived themselves to be more adaptable and reported more positive reactions to the learning experiences. This finding highlights the importance of ‘connection to others’ when it comes to online learning. Hence, it is essential for university-level mental health promotion activities to strive to foster adaptability and build ‘academic resilience’, among students, through tapping into elements of self and identity (i.e., internal resources). It is of utmost importance for the students to feel that they belong and matter to other people (i.e., external resources).

The inclusion of instructors in the SRL that takes place in the process of adapting the learning and teaching to accelerated change is not unique to this study. It was previously suggested that the experiential learning that health professions students go through usually entails “strong emotions”. A key responsibility of facilitators of such learning experiences is to harness an environment of trust, authenticity, mutual respect, and integrity (35). This, according to Brookfield (1995), requires educators to be “adult learners”, above all, continuously updating, expanding, and deepening their professional perspectives both on their roles and responsibilities and in relation to the subject matter. He reminds educators that they are required to revisit and analyze their own “visceral” experiences by virtue of their profession before asking their students to do so (36).

The evidence-driven conceptual framework generated from this study confirms the commonality across existent models of SRL and builds upon them (22). These models shed light on the aspects of the self that come together to enable SRL. These include cognitive, metacognitive, behavioral, motivational, and emotional aspects. Similarly, this study highlights the interplay between cognitions (involving metacognitions), emotions (including motivation), and behaviors, along with emphasizing the effect of the all-encapsulating



environment. It offers insight into the context: variables that enabled the individuals' adaptation and those that impeded it. It was previously highlighted that contextual factors impact how students feel a sense of relatedness to their colleagues and instructors (10). All this aligns with the triadic analysis of SRL, which focuses on the relationship between the person, behavior, and environment (37). From the constructivism perspective of experiential learning (i.e., learning through reflection on experience), individuals construct their knowledge through interactions with their environments (35). Individuals in this study appeared to be continuously receiving information from the context and adapting their strategies accordingly. All these insights can be leveraged by other postgraduate dental schools to proactively raise the level of adaptability of individuals, and to create environments that are malleable and conducive to learning goals.

This study shows that the tailor-made quantitative tool is internally reliable and externally valid in the context of this study. There are several tools published in the literature that are designed to measure self-reported adaptation and/ or coping with change including the Coping Strategy Questionnaire (CSQ)(38), Coping Orientation to Problems Experienced (COPE) inventory (39), and its abbreviated version, the Brief COPE (40).

These tools proved of great usefulness across several contexts yet are considerably thorough and time-consuming. There are relevant tools that are more succinct in measuring resilience such as the Brief Resilient Coping Scale (BRCS) (41) and the Brief Resilience Scale (BRS) (42). Yet, none are contextualized to accelerated changes to medical education (including but not limited to the abrupt transition to the online environment) during critical times (such as COVID-19), and factor qualitative reflections into the equation. Accordingly, this study bridges this gap by introducing a concise data collection tool that directly tapped into how postgraduate dental students regulated themselves and maneuvered through the exceptionally

VUCA environment of COVID-19. Also, the instrument developed and deployed in the current study inquired for qualitative data, which encouraged participants to reflect on their experience. This proved to be of great added value to better understand the processes that the stakeholders went through to self- and co-regulate and in turn thrive.

It is worth noting in terms of the participants' self-awareness, the modifications in behaviors were the most obvious and easiest to identify in this study. Along those lines, in another exploratory study during COVID-19 (6), modifications in learning (among the learners) or teaching (among the instructors) were also apparent, where learners and instructors modified their approaches to adapt to the rapid transition to distance learning. Such findings that offer insight into the organic growth and development that is inherent to the adaptation process constitute empirical evidence supporting Zimmerman's cyclical model, which suggests that SRL is a process that involves forethought, followed by performance, and finally, self-reflection (43). Moreover, as evident in the qualitative exploration integral to this study, negative thoughts and emotions surfaced for the stakeholders, whether they were aware of it or not. It is worth highlighting, over here, the importance of building an environment where individuals feel safe to experience, and in turn, let go of these emotions (44). The fact that such negativity surfaces is not unexpected given the VUCA of the situation. The more we empower higher education stakeholders to acknowledge (i.e., become aware of), accept (and respect), and experience (and in turn process) their emotions and thoughts, the less resistant and more adaptable to change they will become (45, 46). This is directly related to fostering cognitive flexibility, which is defined as the ability to adapt the cognitive processing strategies to face new, unexpected, and uncertain conditions in the environment (47, 48)

The current study is characterized by a few caveats that are worth shedding light on. It relied mainly on self-reported data. Each of the two groups of stakeholders provided some reflective

data on the other party's adaptability. It would be interesting for follow-up studies to further explore this point-of-view by systematically enabling observer rating. This will allow for comparing how the perception of one's adaptability maps onto how others perceive one's adaptability. Moreover, in alignment with the principles of the Institutional Research function at MBRU, complete anonymity of the participating university stakeholders was maintained. Therefore, demographic details of the participants (e.g., gender and age) or that relating to their affiliation with the university (e.g., year of study and academic title) were not recorded. It would have been interesting to investigate the association between the stakeholders' extent of adaptability and those variables. Also, although this study offered a lot of insight into how the stakeholders perceive themselves and each other when it comes to adaptability, its cross-sectional design did not enable investigating causality. Hence, it will be great for future studies to be based on longitudinal designs, where potential antecedents to adaptability are captured. The findings of such studies will have substantial practical implications where higher education decision-makers will get a better grasp as to what variables they can foster to proactively raise the level of adaptability among their stakeholders. The study offered a lot of value through the open-ended questions integral to the survey in terms of exploration. Yet, we believe it is worth deploying alternative data collection tools (e.g., focus group sessions) to develop a more thorough understanding of the adaptability experiences of the stakeholders.

## Conclusion

This study encourages opinion leaders in higher education institutions to leverage SRL theories to proactively inspire and empower the learners and their instructors. It also reveals the importance of developing and maintaining safe and nurturing learning environments that foster connection and mattering (to one another), enable cognitive flexibility, and build academic resilience.

## Conflicts of interest

The authors confirm no conflicts of interest.

## References

1. Bennett N, Lemoine GJ. What VUCA Really Means for You: Harvard Business Review 2014. [cited 15 March 2021] [Available from: <https://hbr.org/2014/01/what-vuca-really-means-for-you>].
2. George B. VUCA 2.0: A Strategy For Steady Leadership In An Unsteady World: Forbes; 2017. [cited 17 March 2021] [Available from: <https://www.forbes.com/sites/hbsworkingknowledge/2017/02/17/vuca-2-0-a-strategy-for-steady-leadership-in-an-unsteady-world/?sh=1a507c6813d8>].
3. Kraaijenbrink J. What Does VUCA Really Mean? 2018. [cited 17 April 2021]. [Available from: <https://www.forbes.com/sites/jeroenkraaijenbrink/2018/12/19/what-does-vuca-really-mean/?sh=6227282b17d6>].
4. HHS Issues New Report Highlighting Dramatic Trends in Medicare Beneficiary Telehealth Utilization amid COVID-19: U.S. Department of Health & Human Services; 2020. [cited 12 May 2021] [Available from:

<https://www.hhs.gov/about/news/2020/07/28/hhs-issues-new-report-highlighting-dramatic-trends-in-medicare-beneficiary-telehealth-utilization-amid-covid-19.html>.

5. Andrienko O. What Businesses Should do to Survive COVID-19 2020. [cited 10 May 2021]. [Available from: <https://www.semrush.com/blog/ecommerce-covid-19/>].

6. Rad FA, Otaki F, Baqain Z, Zary N, Al-Halabi M. Rapid transition to distance learning due to COVID-19: Perceptions of postgraduate dental learners and instructors. PLoS One. 2021;16(2):e0246584.

7. Gewin V. Five tips for moving teaching online as COVID-19 takes hold. Nature. 2020;580(7802):295-6.

8. Popa S. Reflections on COVID-19 and the future of education and learning. PROSPECTS. 2020;49(1):1-6.

9. Afrouz R. Approaching uncertainty in social work education, a lesson from COVID-19 pandemic. Qualitative Social Work. 2021;20(1-2):561-7.

10. Besser A, Flett GL, Zeigler-Hill V. Adaptability to a sudden transition to online learning during the COVID-19 pandemic: Understanding the challenges for students. Scholarship of Teaching and Learning in Psychology. 2020;Advance Online Publication.

11. Purcell WM, Lumbreras J. Higher education and the COVID-19 pandemic: navigating disruption using the sustainable development goals. Discover Sustainability. 2021;2(1):6.

12. Coman C, Țîru LG, Meseșan-Schmitz L, Stanciu C, Bularca MC. Online Teaching and Learning in Higher Education during the Coronavirus Pandemic: Students' Perspective. Sustainability. 2020;12(24):10367.

13. Darling-Hammond L, Hyler ME. Preparing educators for the time of COVID ... and beyond. European Journal of Teacher Education. 2020;43(4):457-65.

14. Hammond T, Watson K, Brumbelow K, Fields S, Shryock K, Chamberland JF, et al. A Survey to Measure the Effects of Forced Transition to 100% Online Learning on

675 Community Sharing, Feelings of Social Isolation, Equity, Resilience, and Learning Content  
676 During the COVID-19 Pandemic. 2020.

677 15. Kapasia N, Paul P, Roy A, Saha J, Zaveri A, Mallick R, et al. Impact of lockdown on  
678 learning status of undergraduate and postgraduate students during COVID-19 pandemic in  
679 West Bengal, India. *Children and Youth Services Review*. 2020;116:105194.

680 16. Toquero CM. Challenges and Opportunities for Higher Education amid the COVID-  
681 19 Pandemic: The Philippine Context. . *PEDAGOGICAL RES*. 2020;5(4):Article No:  
682 em0063.

683 17. Ahmed H, Allaf M, Elghazaly H. COVID-19 and medical education. *Lancet Infect*  
684 *Dis*. 2020;20(7):777-8.

685 18. Deery C. The COVID-19 pandemic: implications for dental education. *Evid-based*  
686 *Dent*. 2020;21(2):46-7.

687 19. Germaine R, Richards J, Koeller M, Schubert-Irastorza C. Purposeful Use of 21st  
688 Century Skills in Higher Education. *Journal of Research in Innovative Teaching*.  
689 2016;9(1):19-29.

690 20. International Society for Technology in Education. Iste Standards For Students.  
691 [cited 20 April 2021] [Available from: <https://www.iste.org/standards/for-students>].

692 21. International Society for Technology in Education. Iste Standards For Educators.  
693 [cited 20 April 2021]. [Available from: <https://www.iste.org/standards/for-educators>].

694 22. Panadero E. A Review of Self-regulated Learning: Six Models and Four Directions  
695 for Research. *Front Psychol*. 2017;8:422.

696 23. Martin AJ, Nejad HG, Colmar S, Liem GAD. Adaptability: How students' responses  
697 to uncertainty and novelty predict their academic and non-academic outcomes. *J Educ*  
698 *Psychol*. 2013;105(3):728-46.

- 699 24. Guetterman TC, Fetters MD, Creswell JW. Integrating Quantitative and Qualitative  
700 Results in Health Science Mixed Methods Research Through Joint Displays. *Ann Fam Med*.  
701 2015;13(6):554-61.
- 702 25. Guetterman TC, Molina-Azorin JF, Fetters MD. Virtual Special Issue on “Integration  
703 in Mixed Methods Research”. *Journal of Mixed Methods Research*. 2020;14(4):430-5.
- 704 26. Fetters MD, Molina-Azorin JF. Call for Papers for a Special Issue on COVID-19 and  
705 Novel Mixed Methods Methodological Approaches During Catastrophic Social Changes.  
706 *Journal of Mixed Methods Research*. 2020;14(3):281-7.
- 707 27. Braun V, Clarke V. Using thematic analysis in psychology. *Qualitative Research in*  
708 *Psychology*. 2006;3(2):77-101.
- 709 28. Kiger ME, Varpio L. Thematic analysis of qualitative data: AMEE Guide No. 131.  
710 *Med Teach*. 2020;1-9.
- 711 29. Haynes-Brown TK, Fetters MD. Using Joint Display as an Analytic Process: An  
712 Illustration Using Bar Graphs Joint Displays From a Mixed Methods Study of How Beliefs  
713 Shape Secondary School Teachers’ Use of Technology. *International Journal of Qualitative*  
714 *Methods*. 2021;20:1609406921993286.
- 715 30. Johnson RE, Grove AL, Clarke A. Pillar Integration Process: A Joint Display  
716 Technique to Integrate Data in Mixed Methods Research. *Journal of Mixed Methods*  
717 *Research*. 2017;13(3):301-20.
- 718 31. Winne PH, Hadwin AF, Gress C. The learning kit project: Software tools for  
719 supporting and researching regulation of collaborative learning. *Comput Human Behav*.  
720 2010;26(5):787-93.
- 721 32. Boekaerts M, Rozendaal JS. New insights into the self-regulation of writing skills in  
722 secondary vocational education. . *Zeitschrift für Psychologie/Journal of Psychology*, .  
723 2007;215(3):164–73.

- 724 33. Zimmerman BJ. From Cognitive Modeling to Self-Regulation: A Social Cognitive  
725 Career Path. *Educ Psychol.* 2013;48(3):135-47.
- 726 34. Quay J. Experience and Participation: Relating Theories of Learning. *Journal of*  
727 *Experiential Education.* 2003;26(2):105-12.
- 728 35. Fenwick TJ. *Experiential Learning: A Theoretical Critique from Five Perspectives.* .  
729 Columbus, OH: ERIC Clearinghouse on Adult, Career and Vocational Education; 2001.
- 730 36. Brookfield SD. *Becoming a critically reflective teacher.*: John Wiley & Sons; 2017.
- 731 37. Zimmerman BJ. A social cognitive view of self-regulated academic learning. *J Educ*  
732 *Psychol.* 1989;81(3):329–39.
- 733 38. Rosenstiel AK, Keefe FJ. The use of coping strategies in chronic low back pain  
734 patients: relationship to patient characteristics and current adjustment. *Pain.* 1983;17(1):33-  
735 44.
- 736 39. Carver CS, Scheier MF, Weintraub JK. Assessing coping strategies: a theoretically  
737 based approach. *J Pers Soc Psychol.* 1989;56(2):267-83.
- 738 40. Carver CS. You want to measure coping but your protocol's too long: consider the  
739 brief COPE. *Int J Behav Med.* 1997;4(1):92-100.
- 740 41. Sinclair VG, Wallston KA. The development and psychometric evaluation of the  
741 Brief Resilient Coping Scale. *Assessment.* 2004;11(1):94-101.
- 742 42. Smith BW, Dalen J, Wiggins K, Tooley E, Christopher P, Bernard J. The brief  
743 resilience scale: Assessing the ability to bounce back. *Int J Behav Med.* 2008;15(3):194-200.
- 744 43. Zimmerman BJ, Kitsantas A. Developmental phases in self-regulation: Shifting from  
745 process goals to outcome goals. *J Educ Psychol.* 1997;89(1):29-36.
- 746 44. Maté G. *How to Build a Culture of Good Health.* Yes! Solutions Journalism. 2015.
- 747 45. Levine PA, Frederick A. *Waking the tiger: Healing trauma: The innate capacity to*  
748 *transform overwhelming experiences.* Berkeley, CA: North Atlantic Books; 1997.



749 46. Levine PA. In an unspoken voice: How the body releases trauma and restores  
750 goodness. Berkeley, CA: North Atlantic Books; 2010.

751 47. Cañas JJ. Cognitive Flexibility. In: Karwowski W, editor. International encyclopedia  
752 of ergonomics and human factors. 2nd edition CRC Press; 2006.

753 48. Cañas J, Quesada JF, Antolí A, Fajardo I. Cognitive flexibility and adaptability to  
754 environmental changes in dynamic complex problem-solving tasks. Ergonomics.  
755 2003;46(5):482-501.

756

**Percentages of the mean (of self-reported adaptability) per component**

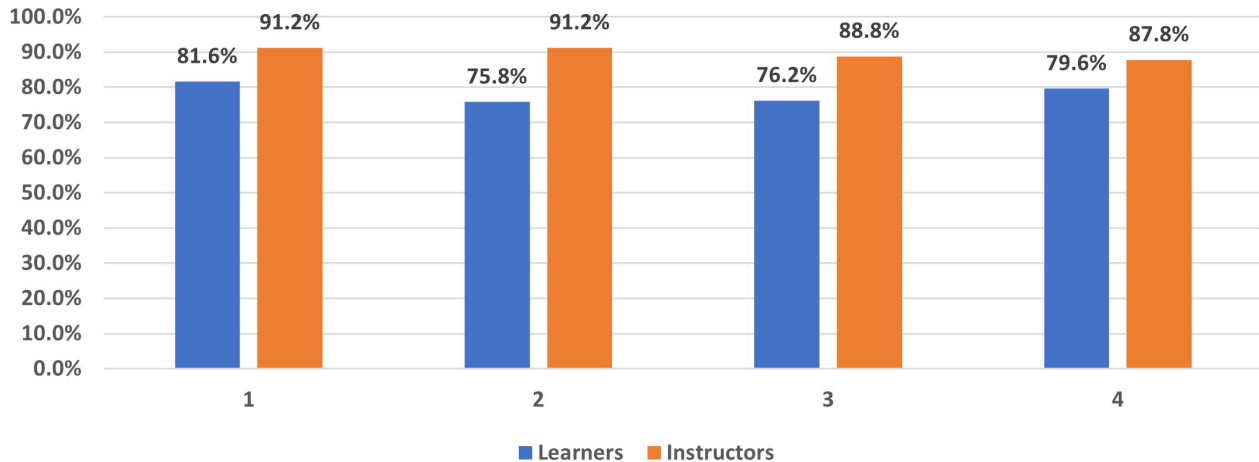

**ENVIRONMENT**

The diagram illustrates the C-ABC model of behavior, showing the relationship between the environment, the self, and internal psychological states. The outermost layer is the **ENVIRONMENT**, represented by a white circle with a brown dotted border. Inside the environment is the **SELF**, represented by a solid brown circle. Within the self, there are three interconnected components: **Behaviors** (red oval), **Cognitions** (yellow oval), and **Emotions** (blue oval). Each of these three components is connected to the central **SELF** label by a double-headed arrow, indicating a reciprocal relationship between the self and each of these internal states.

Behaviors

Cognitions

**SELF**

Emotions
